# Supplementary material for: Correlation Between MRI Findings and Clinical Impairment In Patients With Shoulder Adhesive Capsulitis: A Prospective Study
Source: Research Square preprint supplement (doi:10.21203/rs.3.rs-126930/v1), 2020-12-21
Supplement: Supplementary file 1 [file 038d288632a4d7f8a29a4bbc.docx]

**CORRELATION BETWEEN MRI FINDINGS AND CLINICAL IMPAIRMENT IN PATIENTS WITH SHOULDER ADHESIVE CAPSULITIS: A PROSPECTIVE STUDY.**

Authors:

Romain GILLET1 MD*, François ZHU1 MD, Pierre PADOIN1 MD, Aymeric RAUCH1 MD, Gabriella HOSSU2 MD, Pedro TEIXEIRA1 MD, PhD, Alain BLUM1 MD, PhD

1 Guilloz Imaging department, Central Hospital, University Hospital Center of Nancy, Nancy, France.

2CIC-IT, CHRU Nancy, Université de Lorraine, Nancy, France.

Correspondence to :

Romain GILLET; Guilloz Imaging department, Central Hospital, University Hospital Center of Nancy, 29 avenue du Maréchal de Lattre de Tassigny, 54035 Nancy cedex, France; tel: +33 3 83 85 21 61; fax: +33 3 83 85 97 25; email adress: romain_gillet3@hotmail.com

Supplemental Material

| **Parameters** | **Degree** | **Points** |
| --- | --- | --- |
| Pain | None | 15 |
|  | Mild | 10 |
|  | Moderate | 5 |
|  | Severe | 0 |
| Activties of daily living | Full work | 4 |
|  | Full recreation/sport | 4 |
|  | Unaffected sleep | 2 |
| Arm positionning | Up to the waist | 4 |
|  | Up to the xiphoid | 2 |
|  | Up to the neck | 6 |
|  | Up to the top of the head | 8 |
|  | Above the head | 10 |
| Forward elevation | 0-30° | 0 |
|  | 31-60° | 2 |
|  | 61-90° | 4 |
|  | 90-120° | 6 |
|  | 121-150° | 8 |
|  | 151-180° | 10 |
| Abduction | 0-30° | 0 |
|  | 31-60° | 2 |
|  | 61-90° | 4 |
|  | 90-120° | 6 |
|  | 121-150° | 8 |
|  | 151-180° | 10 |
| Combined external rotation | Hand behind head, elbow forward | 2 |
|  | Hand behind head, elbow back | 2 |
|  | Hand on top of head, elbow forward | 2 |
|  | Hand on top of head, elbow back | 2 |
|  | Full elevation from top of head | 2 |
| Combined internal rotation | Interscapular region | 10 |
|  | Inferior tip of scapula | 8 |
|  | Twelfth rib | 6 |
|  | Lumbosacral junction | 4 |
|  | Buttock | 2 |
|  | Lateral Thigh | 0 |
|  | Score | x/75 |
|  |  |  |
| Diurnal Pain | Yes/No |  |
| Night Pain | Yes/No |  |
| Predominance of Night Pain | Yes/No |  |
| Pain duration | No pain | 0 |
|  | Less than 6 weeks | 1 |
|  | Between 6 weeks and 3 months | 2 |
|  | Between 3 and 6 months | 3 |
|  | Between 6 months and 1 year | 4 |
|  | Over 1 year | 5 |
